# Supplementary material for: Understanding the structural basis of HIV-1 restriction by the full length double-domain APOBEC3G
Source: PubMed Central journal article supplement (PMC6994475; doi:10.1038/s41467-020-14377-y), 2020-01-31
Supplement: 41467_2020_14377_MOESM1_ESM.pdf [file 41467_2020_14377_MOESM1_ESM.pdf]

# **Supplementary Information**

## **Understanding the Structural Basis of HIV-1 Restriction by the Full Length Double-Domain APOBEC3G**

**Yang et al.**

Supplementary Figures 1-10

Supplementary Tables 1-5

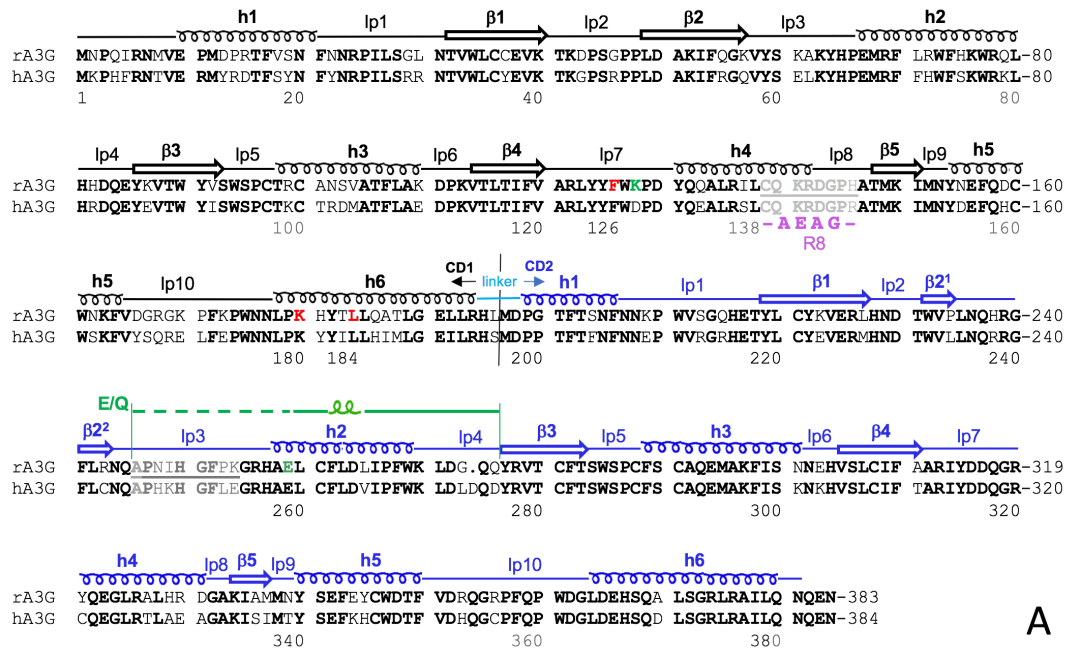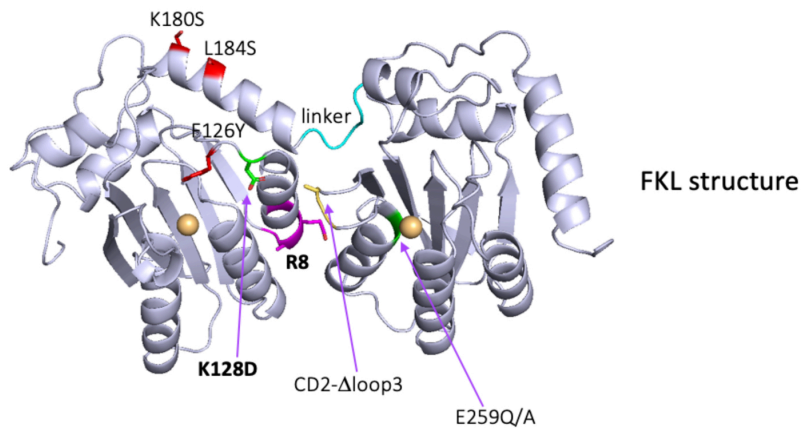

| FKL (Crystal1)        | E/Q (Crystal2)                              |
|-----------------------|---------------------------------------------|
| F126Y                 |                                             |
| K128D                 | K128D (to that of hA3G for Vif-degradation) |
| R8 (CD1 loop8 switch) | R8 (CD1 loop8 switch)                       |
| K180S/L184S           |                                             |
| CD2-Δloop3            |                                             |
| E259A                 | E259Q                                       |

A

B

**Supplementary Figure 1. (A)** Sequence alignment of rA3G and hA3G, with the 2<sup>nd</sup> structure assignment indicated at the top. The linker between CD1 and CD2 is indicated. The disordered loop 3 (the 9 residues in light-grey and indicated by dashed line above) and re-folded h2 (green line) of CD2 in E/Q structure are indicated. The 8 residues in CD1-loop 8 (in light-grey) are replaced by 4 residues (-AEAE-, labeled as R8 below in purple) to increase the solubility of the full-length A3G constructs for crystallization. In addition, the 2 residues in green are mutated in the E/Q structure, and the 2 residues in green plus the 3 residues in red are mutated in FKL construct (see S-Table 1). **(B)** View of the FKL structure, with the mutated residues indicated in the structure. The mutated residues in FKL and E/Q structures are listed at the bottom.

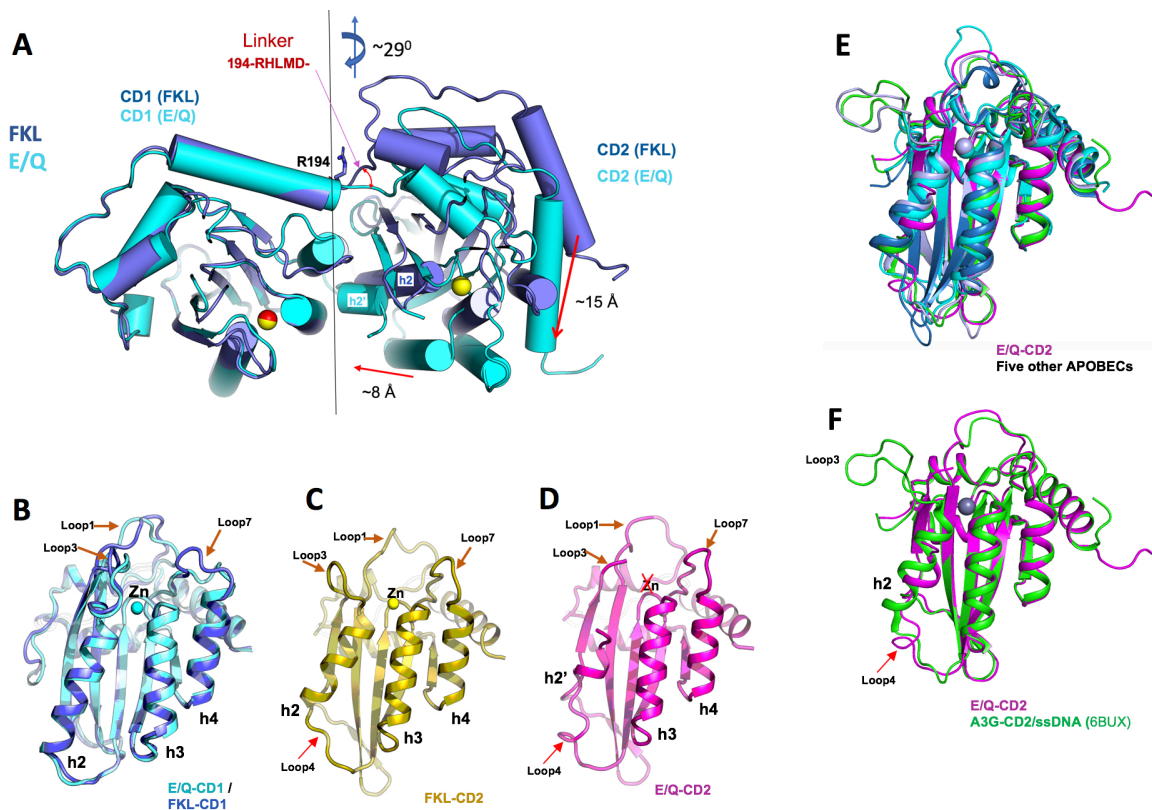

**Supplementary Figure 2.** Structural differences between the E/Q structure and the FKL structure of full-length rA3G. **(A)** Superimposition of the two structures of full-length rA3G. The superimposition is based on CD1 domains to reveal the rotation and angel differences between CD1 and CD2 of two structures. **(B)** The superimposition of CD1 domains of the two structures, showing close similarity. **(C)** The CD 2 domain of FKL structure. **(D)** the CD2 domain of E/Q structure. **(E)** The superimposition of E/Q CD2 (in magenta) with five other APOBEC structures, including PDBIDs 5HX4 (Zn-free A3F-CD2)<sup>1</sup>, 5W3V (A3H)<sup>2</sup>, 6BUX (A3G-CD2+ssDNA)<sup>3</sup>, 3WUS (Zn-bound A3F-CD2)<sup>4</sup>, and 3IR2 (apo-A3G structures)<sup>5</sup>. Except E/Q CD2, all the five other APOBEC domains compared here (including the Zn-free A3F-CD2) align with each other very well. **(F)** The superimposition of E/Q CD2 (in magenta) with the ssDNA bound A3G-CD2 (in green) (6BUX)<sup>3</sup>. The Zn-free E/Q CD2 does not align well in the h2-loops 3, 4 area with ssDNA bound A3G-CD2.



E/Q structure CD1-CD2 interacting residues

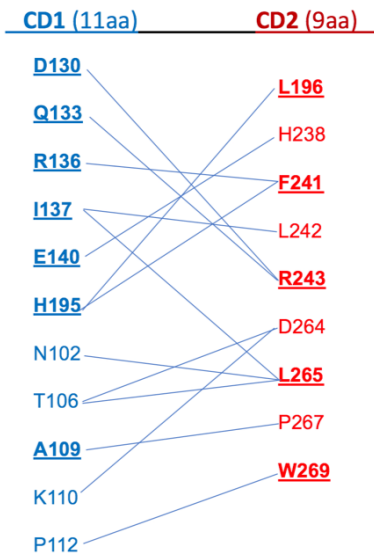

FKL structure CD1-CD2 interacting residues

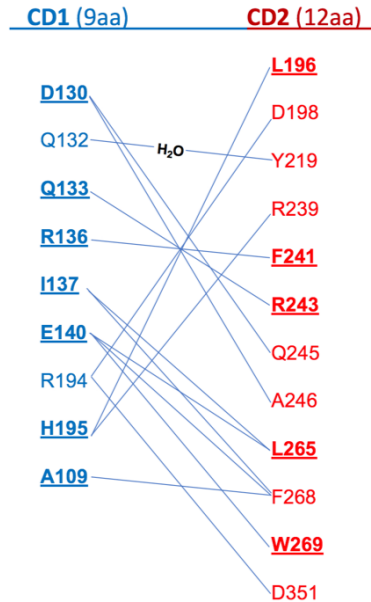

**Supplementary Figure 4.** The interacting residues buried within CD1-CD2 interface on CD1 or CD2 in the E/Q structure and FKL structure of full-length rA3G. The line connects the residues on the two domains indicating interaction through hydrogen bonds or H<sub>2</sub>O mediated hydrogen bond, hydrophobic interactions, or charge-pi stacking. The residues involved in the interface interactions in both structures are underlined.

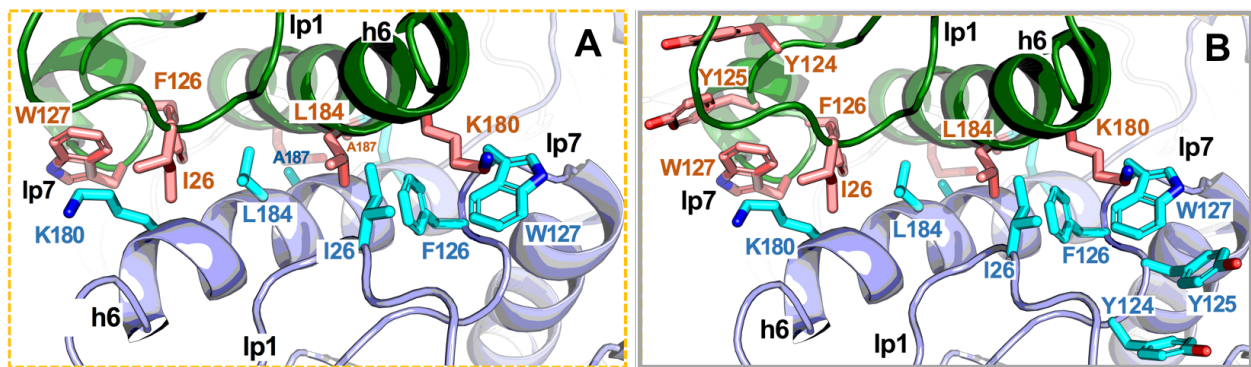

**Supplementary Figure 5.** The residues involved in the protein-protein dimer interface interactions. **(A)** Residues directly involved in dimer-interface hydrophobic packing, including the packing between W127 and the aliphatic side chain of K180. **(B)** The same as in panel-A, drawn with extra-residues Y125 and Y124 that packs with W127 and F126 to stabilize the conformation of W127.

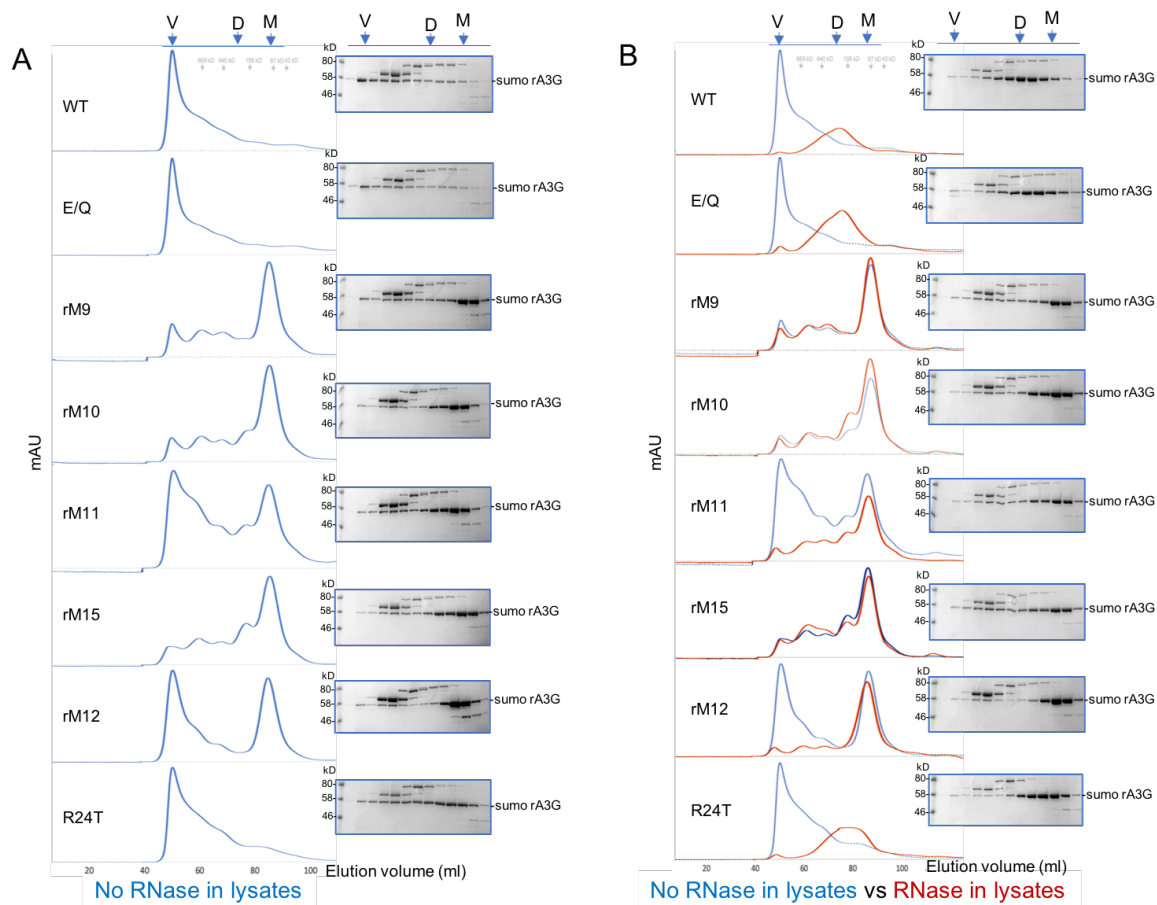

**Supplementary Figure 6. (A, B)** The alignment of individual SEC profiles of different mutants of full-length sumo-rA3G proteins before (A) and after (B) RNase A treatment (see Fig. 3D-E). The SDS-PAGE analysis of the protein distribution across the peak fractions is shown next to the SEC profile of each construct. Source data are provided in the Source Data file.

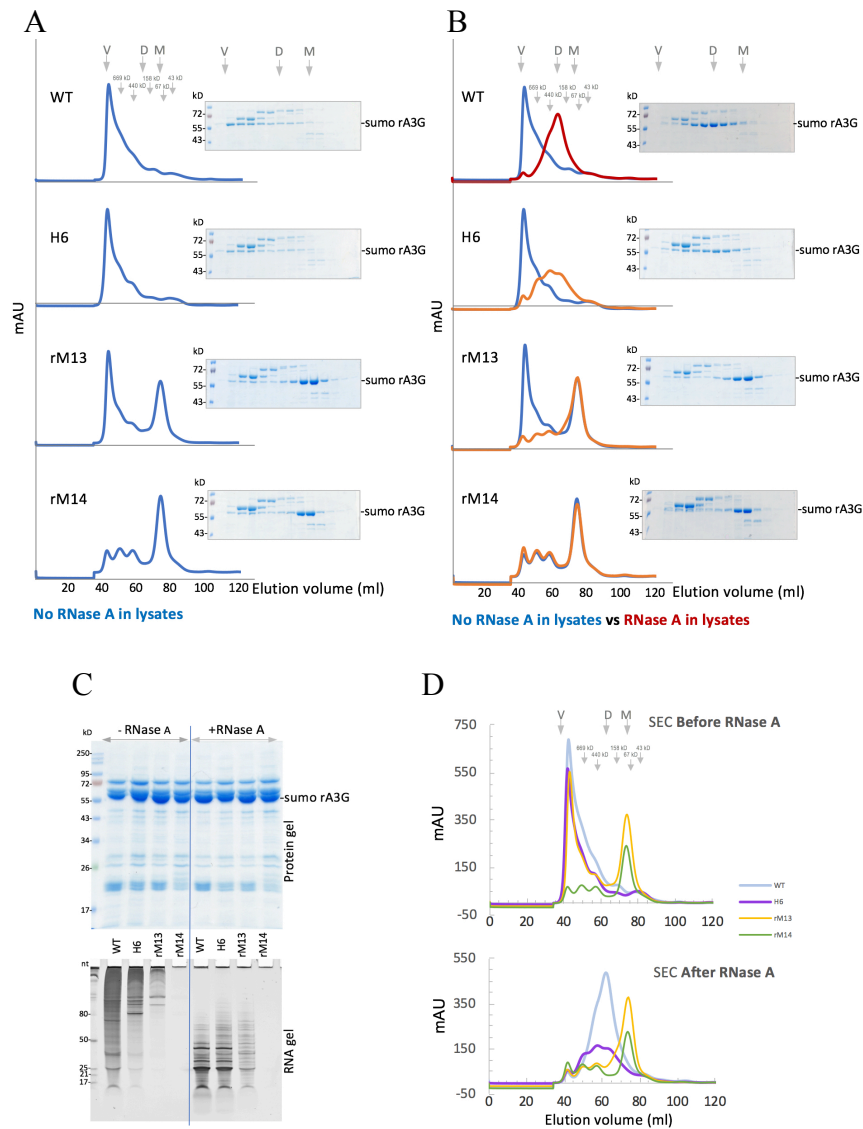

**Supplementary Figure 7.** Probing dimerization and RNA association of rA3G-hA3G<sub>H6</sub> chimera (H6) and the PEP area mutants rM13, rM14 of rA3G. The H6 chimera is based on WT rA3G but with its helix 6 replaced with the WT helix 6 sequence of hA3G so that the dimer-dimer interface residues through h6-loop1-loop7 are identical to that of hA3G. **(A, B)** The alignment of individual SEC profiles of H6 chimera and the PEP area mutants rM13, rM14 of full-length rA3G proteins before **(A)** and after **(B)** RNase A treatment. WT rA3G is used as a control. The SDS-PAGE analysis of the protein distribution across the peak fractions is shown next to the SEC profile of each construct. All constructs were assayed as His<sub>6</sub>-sumo-fusions. **(C)** The SDS-PAGE protein gel analysis (top) of the His<sub>6</sub>-sumo-rA3G WT and various mutants after nickel affinity column purification, and 20% denaturing urea polyacrylamide gel analysis (bottom) of RNAs associated with the proteins without/with RNase A treatment during purification. **(D)** Superdex-200 size exclusion chromatography (SEC) analysis of the proteins before (top) and after (bottom) RNase A treatment. The positions corresponding to void volume, dimer, and monomer are indicated with arrows. Source data are provided in the Source Data file.

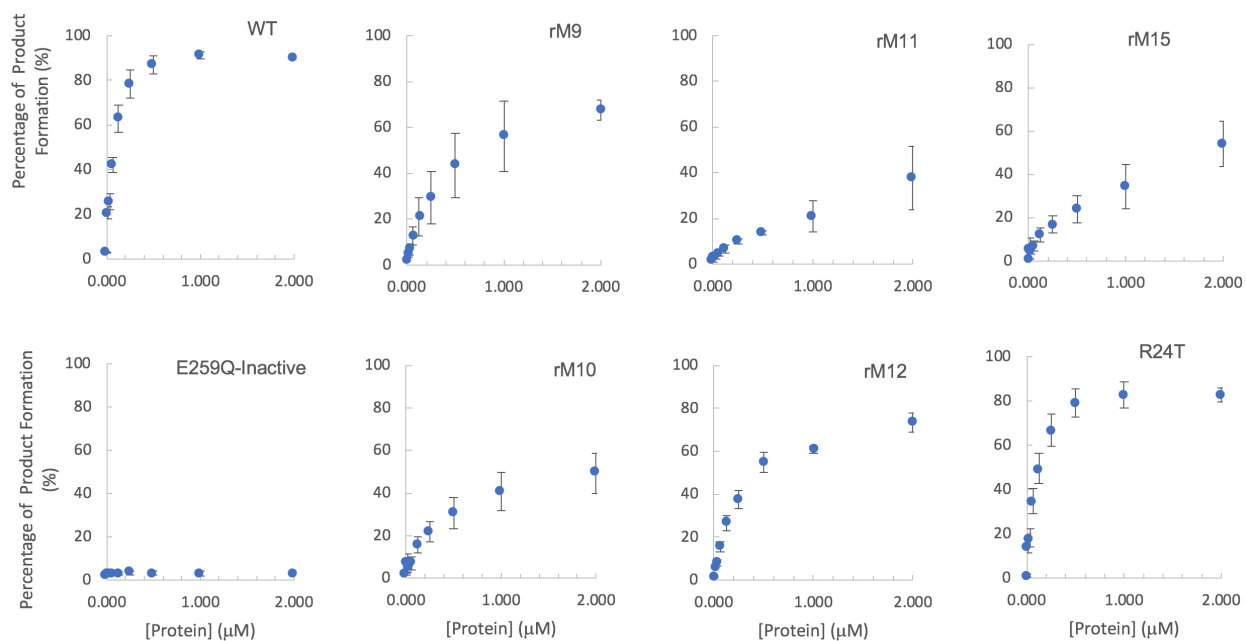

**Supplementary Figure 8.** Deaminase activity of rA3G mutant proteins (see S-Table 3) purified from E. coli expression. WT and E/Q (E259Q) were used as positive and negative controls. Source data are provided in the Source Data file.



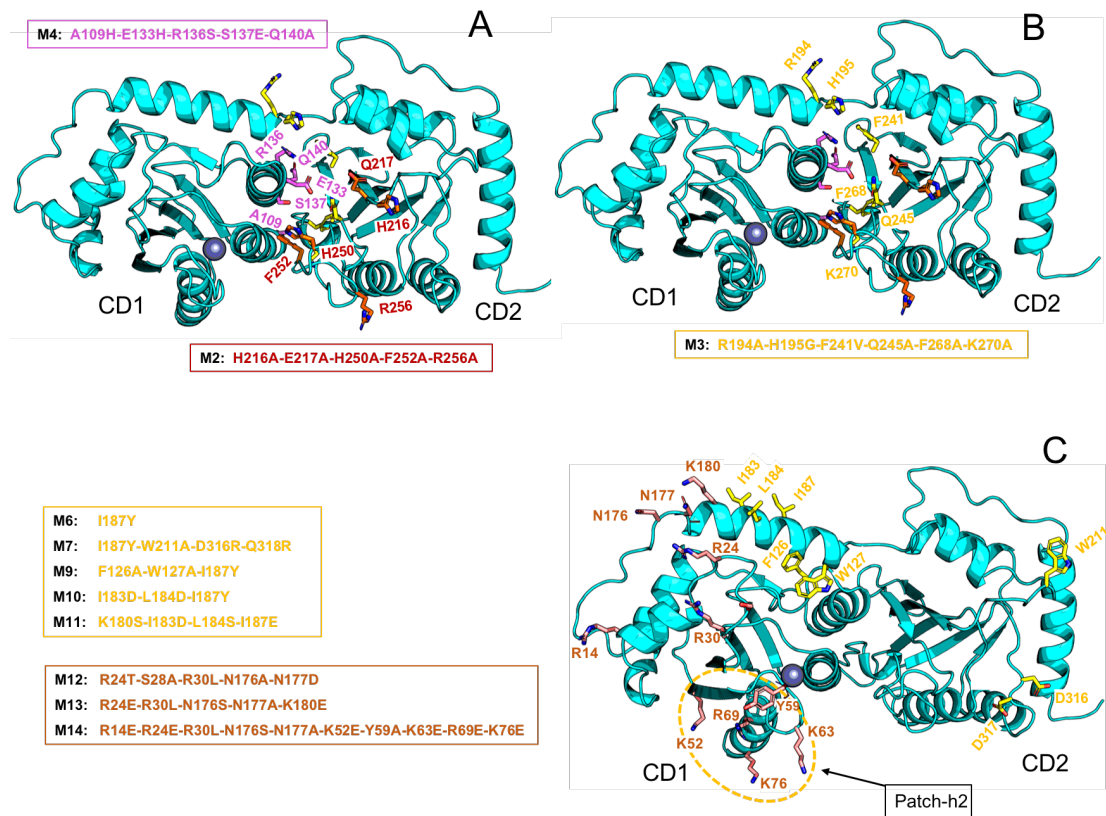

**Supplementary Figure 9.** The ribbon representation of hA3G model built based on rA3G E/Q structure, with all mutated residues shown in stick model and labeled. **(A, B).** Locations of all the mutated residues in the hA3G mutants M2, M3, and M4 in both panels-A and B, but the M2 residues (in red) and M4 (in pink) are labeled in panel-A, and M3 (in yellow) labeled in panel-B. **(A)** The mutated residues of M2 are on CD2-loop 1 and 3 that are near CD1 but surface exposed. The mutated residues of M4 are on the CD1 side within the interface area with CD2. **(B)** The mutated residues of M3 are on the CD2 side on the interface area with CD1. **(C).** Locations of all the mutated residues in hA3G mutants M6, M7, M9, M10, and M11 (side chains colored in yellow), and the mutants M12, M13, and M14 (colored in salmon). The four K/R residues on the patch centered round CD1 h2 (Patch-h2) included only in M14 is indicated by a yellow circle. It is worth noting that despite the conformational difference between the E/Q and the FKL structures mostly at the CD2 Zn-center and at the interface between CD1-CD2, the location of these surface residues for mutation are generally conserved on both structures. Therefore we only use the E/Q for hA3G model building.

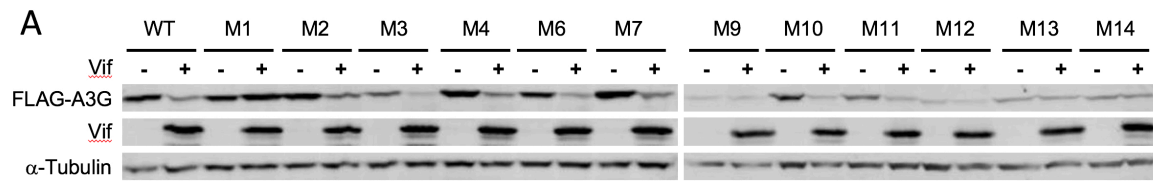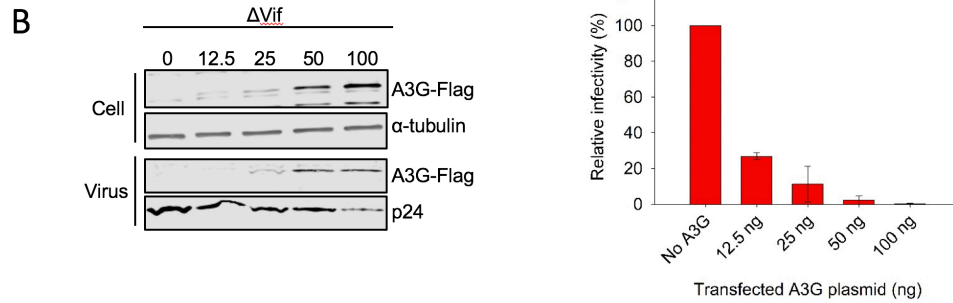

**Supplementary Figure 10.** HIV-1 Vif sensitivity of hA3G mutants and Titration of WT hA3G expression level and HIV-restriction activity. **(A).** Western blot showing HIV-1 Vif sensitivity assay of the hA3G mutants (see S-table 4). The presence and absence of Vif is indicated. The detectible protein of M9 and M12-M14 constructs appeared to be at low steady state levels even if with increasing amount of transfected DNA after multiple tests with side-side comparison with WT. **(B).** Left-panel, reducing the transfected WT A3G plasmid DNA from 100 ng to 12.5 ng to lower the expression level in order to achieve comparable protein levels as observed for M12-M14. Right-panel, the relative HIV infectivity at different WT A3G levels, showing that at 25-50 ng plasmid DNA that show comparable protein expression to M12-M14, WT A3G showed approximately 4-fold higher restriction activity than M12-M14 (see Fig. 4A-C). Source data are provided in the Source Data file.

**Supplementary Table 1.** Mutations on E/Q and FKL constructs for FL rA3G structure. Besides K128D and the catalytic E259Q mutation, E/Q construct only had a 4-residue (-AEAG-) replacement for the 8-residue (139-CQKRDGPH-146) within CD1 loop 8. FKL construct has additional F126/Y/K180S/L184S and an 8-residue deletion within CD2-loop 3.

| rA3G | CD1   |       |                                  |             | CD2                              |                | Crystals resolution (Å)       |
|------|-------|-------|----------------------------------|-------------|----------------------------------|----------------|-------------------------------|
|      | F126  | K128  | (CD1-loop 8)<br>139-CQKRDGPH-146 | K180-L184   | (CD2-loop 3)<br>247-PNIHGFPK-254 | Catalytic E259 |                               |
| WT   |       |       |                                  |             |                                  |                |                               |
| E/Q  | -     | K128D | -AEAG-                           | -           | -                                | E259Q          | <sup>a</sup> 2.40; 2.58; 2.85 |
| FKL  | F126Y | K128D | -AEAG-                           | K180S/L184S | Deleted ( $\Delta$ loop3)        | E259A          | <sup>b</sup> 2.47             |

**Note:**

<sup>a</sup> Crystals obtained from three conditions having the same dimeric structure, but different resolution.

2.40 Å data from 50 mM HEPES pH 7.0, 10 mM MgCl<sub>2</sub>, 1.5 M (NH<sub>4</sub>)<sub>2</sub>SO<sub>4</sub>, protein buffer in HEPES, pH 7.5.

2.58 Å data from 50 mM Tris-Cl pH 7.4, 25 mM MgCl<sub>2</sub>, 2.0 M (NH<sub>4</sub>)<sub>2</sub>SO<sub>4</sub>, protein buffer in Tris-Cl pH 8.0;

2.85 Å data from 50 mM MES, pH 5.2, 10 mM MgCl<sub>2</sub>, 1.8 M LiSO<sub>4</sub>, and protein buffer in HEPES at pH 7.5.

<sup>b</sup> 2.47 Å data from 0.1 M MES, pH 6.9, 8% PEG 20K, protein buffer in HEPES at pH 7.5.

**Supplementary Table 2.** Data collection and refinement statistics of full length rA3G structures

|                             | <b>FKL<br/>(6P40)</b> | <b>E/Q (pH 5.2)<br/>(6P3Z)</b> | <b>E/Q (pH 7.0)<br/>(6P3X)</b> | <b>E/Q (pH 7.4)<br/>(6P3Y)</b> |
|-----------------------------|-----------------------|--------------------------------|--------------------------------|--------------------------------|
|                             |                       | <b>Data collection</b>         |                                |                                |
| Space group                 | P 1 21 1              | P 1 21 1                       | P 1 21 1                       | P 1 21 1                       |
| Cell dimensions             |                       |                                |                                |                                |
| a, b, c (Å)                 | 62.1, 86.4, 90.2      | 67.8, 153.5, 67.8              | 67.5, 153.2, 67.5              | 67.7, 153.9, 67.7              |
| $\alpha, \beta, \gamma$ (°) | 90.0, 101.4, 90.0     | 90.0, 114.1, 90.0              | 90.0, 114.9, 90.0              | 90.0, 116.4, 90.0              |
| Resolution (Å)              | 50-2.47 (2.51-2.47)*  | 50-2.85 (2.95-2.85)            | 50-2.40 (2.49-2.40)            | 50-2.58 (2.67-2.58)            |
| Rsym or Rmerge              | 0.10 (0.64)           | 0.21 (0.67)                    | 0.10 (0.43)                    | 0.13 (0.51)                    |
| I/ $\sigma$ I               | 15.3 (3.2)            | 8.7 (2.1)                      | 11.9 (3.4)                     | 10.9 (3.7)                     |
| Completeness (%)            | 99.5 (98.6)           | 94.3 (75.7)                    | 97.8 (84.8)                    | 97.6 (82.4)                    |
| Redundancy                  | 3.9 (3.6)             | 6.7 (4.7)                      | 6.7 (5.8)                      | 6.6 (5.7)                      |
| No. reflections             | 65342                 | 27963                          | 47319                          | 38528                          |
|                             |                       | <b>Refinement</b>              |                                |                                |
| Rwork/Rfree                 | 17.29/22.84           | 20.41/24.59                    | 18.86/23.70                    | 19.56/23.75                    |
| No. atoms                   | 6155                  | 6044                           | 6240                           | 6157                           |
| Protein                     | 6040                  | 6042                           | 6042                           | 6042                           |
| Ligand/ion                  | 4                     | 2                              | 2                              | 2                              |
| Water                       | 111                   | --                             | 196                            | 113                            |
| B-factors                   | 50.02                 | 44.30                          | 53.12                          | 55.51                          |
| Protein                     | 50.08                 | 44.31                          | 53.29                          | 55.69                          |
| Ligand/ion                  | 46.97                 | 35.64                          | 40.41                          | 42.83                          |
| Water                       | 47.02                 | --                             | 47.99                          | 45.95                          |
| r.m.s. deviations           |                       |                                |                                |                                |
| Bond lengths (Å)            | 0.009                 | 0.004                          | 0.004                          | 0.005                          |
| Bond angles (°)             | 1.059                 | 0.811                          | 0.739                          | 0.935                          |

Highest-resolution shell is shown in parentheses.

**Supplementary Table 3.** The *in vitro* studies of mutants of FL rA3G designed either to disrupt dimer-interface interactions or to disrupt the enhanced positive electrostatic potential surface to disrupt RNA-binding at the dimer junction area.

| rA3G                    | CD1             |                    |                                                                                     | CD2               | 50nt RNA binding (Kd, nM) | 50nt DNA binding (Kd, nM) |
|-------------------------|-----------------|--------------------|-------------------------------------------------------------------------------------|-------------------|---------------------------|---------------------------|
| WT <sup>a</sup>         | R8 <sup>b</sup> | K128D <sup>c</sup> |                                                                                     | E259 <sup>d</sup> | 22 ± 7                    | 24 ± 4                    |
| E/Q                     | R8              | K128D              |                                                                                     | E259Q             | 19 ± 5                    | 10 ± 2                    |
| rM9                     | R8              | K128D              | F126A-W127A-A187Y<br>[Within dimer-interface]                                       | E259              | 20 ± 4                    | 74 ± 14                   |
| rM10                    | R8              | K128D              | T183D-L184D-A187Y<br>[Within dimer-interface]                                       | E259              | 24 ± 6                    | 53 ± 8                    |
| rM11                    | R8              | K128D              | K180S-T183D-L184S-A187E<br>[Within dimer-interface]                                 | E259              | 21 ± 5                    | 89 ± 23                   |
| rM15                    | R8              | K128D              | I26A-K180S-L184S-A187E<br>[Within dimer-interface]                                  | E259              | 21 ± 3                    | 71 ± 13                   |
| rM12                    | R8              | K128D              | R24T-S28A-N176A-N177D<br>[PEP surface at dimer junction]                            | E259              | 52 ± 11                   | 188 ± 27                  |
| rM13                    | R8              | K128D              | R24E-N176A-N177A-K180E<br>[PEP surface at dimer junction]                           | E259              | 43 ± 9                    | 155 ± 36                  |
| rM14                    | R8              | K128D              | R15E-R24E-N176S-N177A-K52E-Y59A-K63E-R69E-K76E<br>[PEP surface plus positive patch] | E259              | 15 ± 4                    | 102 ± 18                  |
| R24T                    | R8              | K128D              | R24T                                                                                | E259              | 21 ± 6                    | 51 ± 8                    |
| H6 chimera <sup>c</sup> | R8              | K128D              | rA3G 181-HYTLLQAT replaced by hA3G 181-YYILLHIM                                     | E259              | ND                        | ND                        |

**Note:** Mutants at the buried dimer-interface mutants: rM10, rM11, rM15. Mutants on the enhanced positive electrostatic potential: rM12. <sup>a</sup> WT: this designated WT, a parental construct for other full-length rA3G mutants, contains a K128D that enables rA3G to be sensitive to HIV-1 Vif mediated degradation and a replaced CD1-loop 8 (R8, see note <sup>b</sup> next). <sup>b</sup> R8 (replaced loop 8): A stretch of 8 residues 139-CQKRDGPH-146 within CD1-loop 8 is replaced by 4 residues -AEAG- from the CD2-loop 8 of hA3G to increase solubility of the full-length construct. <sup>c</sup> E259 is essential for deaminase activity and E259Q is catalytically inactive. <sup>c</sup> H6 chimera: rA3G containing the helix 6 sequence of hA3G CD1, this H6 construct has the exact hA3G residues at the protein-protein dimer interface if hA3G dimerizes in the same way as rA3G.

All mutated residues except those in red are identical in rA3G and hA3G. The two non-identical residues have matching residues in hA3G as follows (rA3G/hA3G): A187/I187, T183/I183 (see S-Fig. 1). The Kd values for RNA and ssDNA binding were estimated based on native gel shift assay (see S-Fig. 7).

The Kd for RNA or ssDNA binding of the purified proteins of different mutants were estimated using native gel shift assay (see Methods). Source data are provided in the Source Data file.

**Supplementary Table 4.** The in-cell studies of full-length hA3G mutants designed either to disrupt dimer-interface (DI) interactions or to disrupt the enhanced positive electrostatic potential (PEP) surface to disrupt RNA-binding at the dimer junction area.

| hA3G | Mutations of hA3G                                     | Notes                                                              |
|------|-------------------------------------------------------|--------------------------------------------------------------------|
| WT   |                                                       |                                                                    |
| M1   | D128K                                                 |                                                                    |
| M2   | H216A-E217A-H250A-F252A-R256A                         | Mutations on CD2 loop-1, 3 adjacent to CD1                         |
| M3   | R194A-H195G-F241V-Q245A-F268A-K270A                   | Mutations on CD2 interface with CD1                                |
| M4   | A109H-E133H-R136S-S137E-Q140A                         | Mutations on CD1 interface with CD2                                |
| M6   | I187Y                                                 | Dimer interface mutation on CD1 h6                                 |
| M7   | I187Y-W211A-D316R-Q318R                               | Dimer interface mutation on CD1 h6 plus mutations on CD2 loop 1, 7 |
| M9   | F126A-W127A-I187Y                                     | Mutation on CD1 loop 7 (W127) plus CD1 h6                          |
| M10  | I183D-L184D-I187Y                                     | Dimer interface mutation on CD1 h6                                 |
| M11  | K180S-I183D-L184S-I187E                               | Dimer interface mutation on CD1 h6                                 |
| M12  | R24T-S28A-R30L-N176A-N177D                            | PEP surface mutations                                              |
| M13  | R24E-R30L-N176S-N177A-K180E                           | PEP surface mutations                                              |
| M14  | R14E-R24E-R30L-N176S-N177A - K52E-Y59A-K63E-R69E-K76E | PEP surface mutations plus positive patch                          |

**Note:** All mutated residues except those in red are identical in rA3G and hA3G. The non-identical residues in red shown for hA3G here have matching residues in rA3G as follows (hA3G/rA3G): R30/L30, E133/Q133, S137/I137, I187/A187, I183/T183 (see S-Fig. 1). Positive EP: Positive electrostatic potentials that are enhanced at the dimer junction.

**Supplementary Table 5. Analysis of mutagenesis in HIV-1 proviral DNA induced by hA3G mutants in the absence of Vif.**

| A3 enzyme  | Base pairs sequenced | G→A mutations (total) | GG→AG mutations (total) | G→A mutations (per kb) | GG→AG mutations (per kb) |
|------------|----------------------|-----------------------|-------------------------|------------------------|--------------------------|
| No A3G     | 2808                 | 19                    | 14                      | 6.8                    | 5.0                      |
| A3G-WT     | 2106                 | 41                    | 33                      | 19                     | 16                       |
| M1 (D128K) | 3861                 | 57                    | 44                      | 15                     | 11                       |
| M9         | 3159                 | 32                    | 25                      | 10                     | 7.9                      |
| M10        | 2457                 | 21                    | 16                      | 8.5                    | 6.5                      |
| M11        | 3159                 | 35                    | 28                      | 11                     | 8.9                      |
| M12        | 2106                 | 21                    | 19                      | 10                     | 9.0                      |
| M13        | 4212                 | 55                    | 44                      | 13                     | 10                       |
| M14        | 3510                 | 20                    | 15                      | 5.7                    | 4.3                      |

A 351 bp region of HIV-1 *protease* was PCR amplified from a single-cycle replication assays. Clones were sequenced, aligned with Clustal Omega (Sievers et al., 2011), and analyzed using Hypermut (Rose and Korber, 2000). Mutations not in the GG→AG context were GA→AA or GC→AC.

## Supplementary references:

- 1 Shaban, N. M., Shi, K., Li, M., Aihara, H. & Harris, R. S. 1.92 Angstrom Zinc-Free APOBEC3F Catalytic Domain Crystal Structure. *Journal of molecular biology* **428**, 2307-2316, doi:10.1016/j.jmb.2016.04.026 (2016).
- 2 Bohn, J. A. *et al.* APOBEC3H structure reveals an unusual mechanism of interaction with duplex RNA. *Nature communications* **8**, 1021, doi:10.1038/s41467-017-01309-6 (2017).
- 3 Maiti, A. *et al.* Crystal structure of the catalytic domain of HIV-1 restriction factor APOBEC3G in complex with ssDNA. *Nature communications* **9**, 2460, doi:10.1038/s41467-018-04872-8 (2018).
- 4 Nakashima, M. *et al.* Structural Insights into HIV-1 Vif-APOBEC3F Interaction. *Journal of virology* **90**, 1034-1047, doi:10.1128/JVI.02369-15 (2016).
- 5 Shandilya, S. M. *et al.* Crystal structure of the APOBEC3G catalytic domain reveals potential oligomerization interfaces. *Structure* **18**, 28-38, doi:10.1016/j.str.2009.10.016 (2010).
